# Supplementary material
Source: publisher figshare collection journal article supplement (https://gsajournals.figshare.com/articles/dataset/_/6998387)
Supplement: Supplementary file 1 [file 1]

## Sheet: Sheet1
Table S4. Performance of models based on ensemble prediction methods.
Model	AUC With LRT (95% CI)1	AUC Without LRT (95% CI)2
Support vector machine (SVM)	0.9389 (0.9321-0.9458)	0.9381 (0.9274-0.9488)
Random forest	0.9607 (0.9573-0.9641)	0.9549 (0.9495-0.9603)
Generalized linear model with penalized maximum likelihood (glmnet)	0.9620 (0.9594-0.9646)	0.9568 (0.9557-0.9578)
Logistic regression	0.9623 (0.9576-0.9668)	0.9572 (0.9503-0.9641)
Linear discriminant analysis (LDA)	0.9633 (0.9600-0.9666)	0.9543 (0.9477-0.9610)
1AUC from ensemble models of all approaches and its 95% confidence interval (CI) based on 10-fold cross validation. Ensemble models used the formula: prediction ~ LRT + LRTm + SIFT + Provean + PolyPhen2 + GERP.
2AUC from ensemble models without LRT and LRT-masked predictions and its 95% confidence interval (CI) based on 10-fold cross validation. Ensemble models used the formula: prediction ~ SIFT + Provean + PolyPhen2 + GERP.
