# Supplementary material
Source: publisher figshare collection journal article supplement (https://gsajournals.figshare.com/articles/dataset/_/6998387)
Supplement: Supplementary file 2 [file 1]

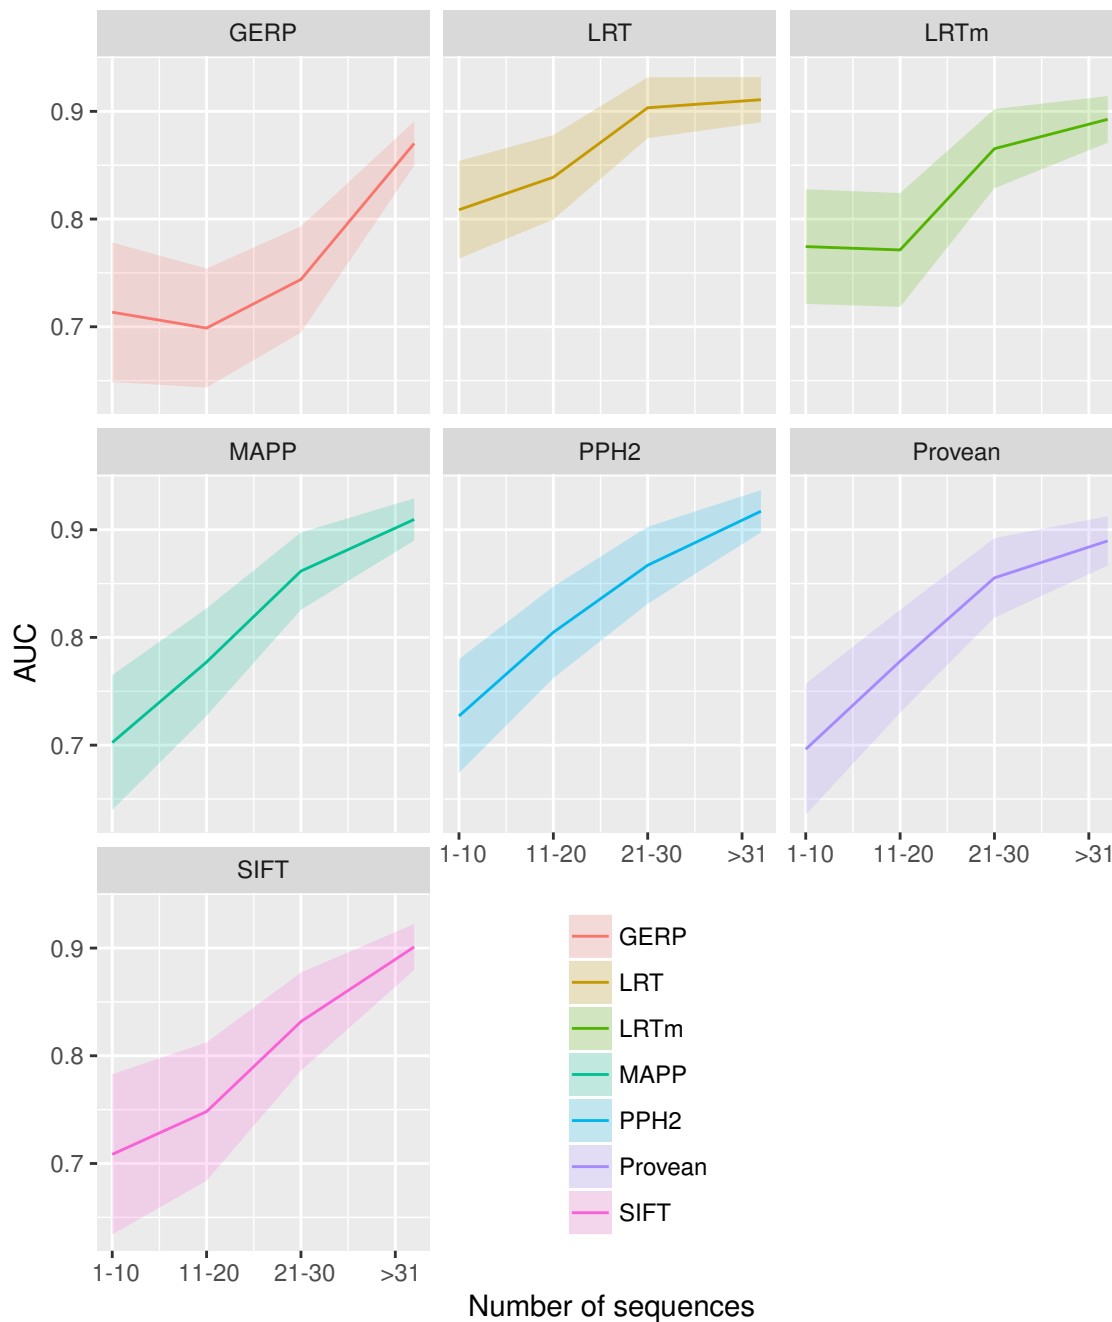

Figure S2. Performance depends on the number of aligned sequences. Performance was measured by the area under the curve (AUC) of sensitivity versus specificity (lines) and 95% confidence intervals were obtained from 2,000 bootstraps (shaded areas). The number of ungapped sequences at the amino acid position of interest was obtained from BAD\_Mutations alignments of proteins from 42 plant genomes. AUC was calculated for four groups binned by the number of aligned sequences.
