# Supplementary material
Source: publisher figshare collection journal article supplement (https://gsajournals.figshare.com/articles/dataset/_/6998387)

# *BAD\_Mutations.py*

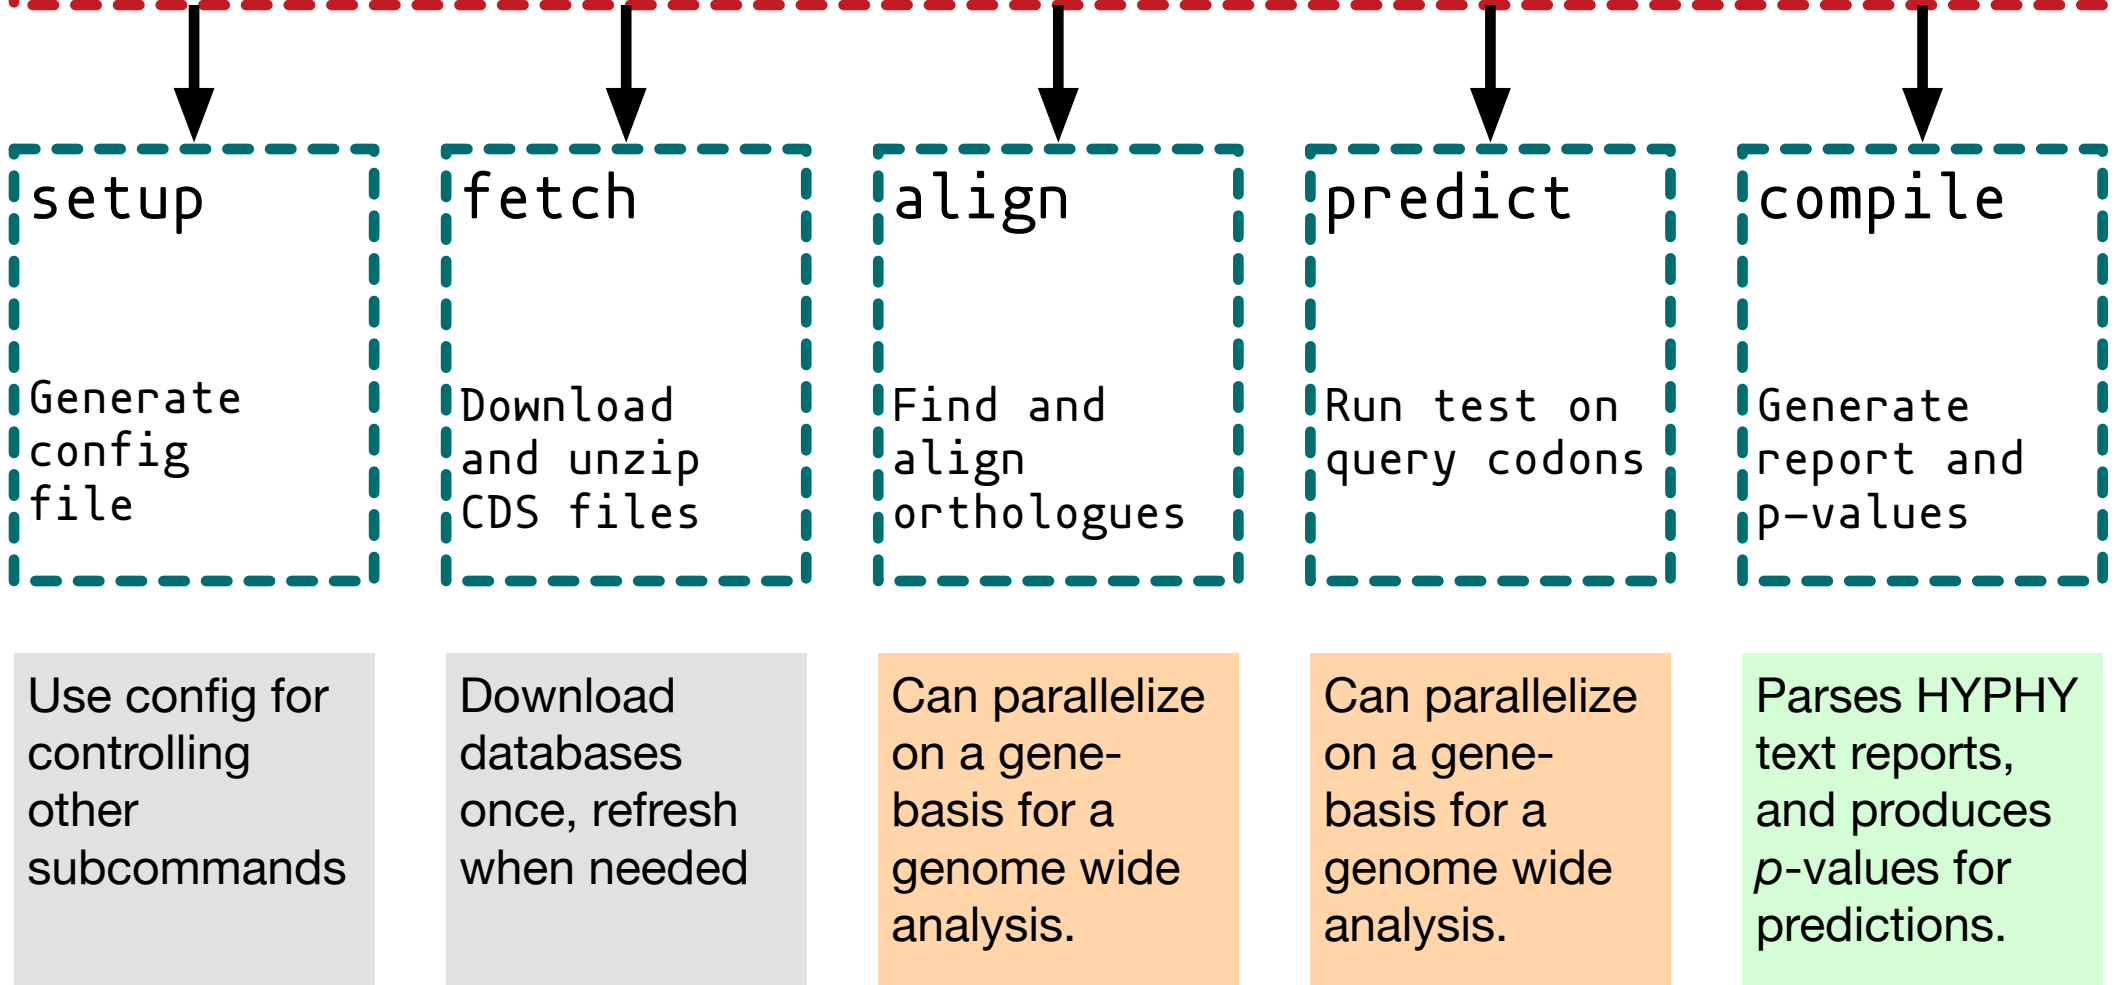

Supplement: Supplementary file 1 [file 1]
